# Supplementary material for: Is Tempranillo Blanco Grapevine Different from Tempranillo Tinto Only in the Color of the Grapes? An Updated Review
Source: MDPI journal article supplement (doi:10.3390/plants11131662), 2022-06-23
Supplement: s1 [file s1]

**Table S1.** Total anthocyanins (Anth) at maturity in Tempranillo Tinto grapevine (*Vitis vinifera* L.) plants grown under different CO<sub>2</sub> concentrations (ambient (400 ppm) (ACO<sub>2</sub>) or elevated (700 ppm) (ECO<sub>2</sub>)), temperature regimes (ambient (T) or ambient + 4 °C (T+4°C)) and water availability (full irrigation (FI) or cyclic drought (CD)). Different letters indicate significant differences among treatments (P < 0.05) based on LSD test (n = 3, mean ± SE). Means without letters or with common letters are not statistically different. Only main factors and interactions P-values that were significant are shown. Data were obtained by T. Kizildeniz during her PhD Thesis following the procedure described in Acevedo De la Cruz et al. [37].

|                                     |                  |    | Anth (mg g <sup>-1</sup> Skin DW) |       | Anth (mg g <sup>-1</sup> Skin DW) |       |        |      |       |       |      |       |     |
|-------------------------------------|------------------|----|-----------------------------------|-------|-----------------------------------|-------|--------|------|-------|-------|------|-------|-----|
|                                     |                  |    | 2013-2015                         |       | 2013                              |       | 2014   |      |       | 2015  |      |       |     |
| T                                   | ACO <sub>2</sub> | FI | 29.6                              | ± 3.2 | 25.9                              | ± 4.1 | ab     | 26.8 | ± 3.0 | abc   | 36.0 | ± 2.2 | a   |
|                                     |                  | CD | 26.3                              | ± 4.4 | 28.9                              | ± 2.3 | a      | 17.7 | ± 1.0 | d     | 32.3 | ± 1.4 | abc |
|                                     | ECO <sub>2</sub> | FI | 24.0                              | ± 2.8 | 18.6                              | ± 1.6 | bc     | 27.8 | ± 4   | ab    | 25.6 | ± 1.0 | bc  |
|                                     |                  | CD | 22.6                              | ± 0.6 | 22.7                              | ± 2.6 | abc    | 21.6 | ± 2.3 | bcd   | 23.5 | ± 0.4 | c   |
| T+4°C                               | ACO <sub>2</sub> | FI | 28.9                              | ± 3.6 | 21.9                              | ± 1.7 | abc    | 31.6 | ± 1.2 | a     | 33.2 | ± 6.0 | ab  |
|                                     |                  | CD | 21.1                              | ± 4.2 | 14.8                              | ± 1.0 | c      | 19.4 | ± 0.7 | d     | 29.0 | ± 4.8 | abc |
|                                     | ECO <sub>2</sub> | FI | 25.1                              | ± 3.8 | 17.7                              | ± 1.5 | c      | 27.0 | ± 2.2 | abc   | 30.5 | ± 1.5 | abc |
|                                     |                  | CD | 23.0                              | ± 2.6 | 20.6                              | ± 4.3 | bc     | 20.3 | ± 1.3 | cd    | 28.2 | ± 2.6 | abc |
| CO <sub>2</sub>                     |                  |    | 0.255                             |       | 0.129                             |       | 0.858  |      |       | 0.020 |      |       |     |
| Temp                                |                  |    | 0.648                             |       | 0.012                             |       | 0.499  |      |       | 0.690 |      |       |     |
| Irrigation                          |                  |    | 0.143                             |       | 0.687                             |       | 0.0001 |      |       | 0.173 |      |       |     |
| CO <sub>2</sub> x Temp              |                  |    | 0.442                             |       | 0.057                             |       | 0.195  |      |       | 0.093 |      |       |     |
| CO <sub>2</sub> x Irrigation        |                  |    | 0.427                             |       | 0.159                             |       | 0.198  |      |       | 0.685 |      |       |     |
| Temp x Irrigation                   |                  |    | 0.591                             |       | 0.150                             |       | 0.582  |      |       | 0.933 |      |       |     |
| CO <sub>2</sub> x Temp x Irrigation |                  |    | 0.681                             |       | 0.250                             |       | 0.688  |      |       | 0.966 |      |       |     |
